# Supplementary material for: Clonal hematopoiesis driven by mutated DNMT3A promotes inflammatory bone loss
Source: PubMed Central journal article supplement (PMC11246233; doi:10.1016/j.cell.2024.05.003), 2024-06-04
Supplement: NIHMS1993381-supplement-MMC1.pdf [file NIHMS1993381-supplement-MMC1.pdf]

**Cell, Volume 187**

**Supplemental information**

**Clonal hematopoiesis driven by mutated DNMT3A  
promotes inflammatory bone loss**

**Hui Wang, Kimon Divaris, Bohu Pan, Xiaofei Li, Jong-Hyung Lim, Gundappa Saha, Marko Barovic, Danai Giannakou, Jonathan M. Korostoff, Yu Bing, Souvik Sen, Kevin Moss, Di Wu, James D. Beck, Christie M. Ballantyne, Pradeep Natarajan, Kari E. North, Mihai G. Netea, Triantafyllos Chavakis, and George Hajishengallis**

SUPPLEMENTAL TABLES (S1 – S3)

| <b>Table S1. Prevalence of CHIP mutations according to variant allele frequency (VAF) among the Dental ARIC participants (n=4,946) – Related to Table 1</b> |                           |                           |
|-------------------------------------------------------------------------------------------------------------------------------------------------------------|---------------------------|---------------------------|
| Participants with CHIP                                                                                                                                      | >2% VAF carriers          | >10% VAF carriers         |
|                                                                                                                                                             | <i>n</i> (column %)       | <i>n</i> (column %)       |
| All                                                                                                                                                         | 191 (100); 3.9% of sample | 108 (100); 2.2% of sample |
| <i>DNMT3A</i> mutation carriers                                                                                                                             | 118 (61.8)                | 72 (66.7)                 |
| <i>TET2</i> mutation carriers                                                                                                                               | 24 (12.6)                 | 8 (7.4)                   |
| <i>ASXL1</i> mutation carriers                                                                                                                              | 17 (8.9)                  | 16 (14.8)                 |
| <i>JAK2</i> mutation carriers                                                                                                                               | 2 (1.1)                   | 1 (0.9)                   |
| Other ( <i>PPM1D, SF3B1, SRSF2, TP53</i> )                                                                                                                  | 30 (15.7)                 | 11 (10.2)                 |

| <b>Table S2. Descriptive information of Dental ARIC study participants with clinical and CHIP data (n=4,946) – Related to Table 1</b> |                  |                   |                                 |                                     |
|---------------------------------------------------------------------------------------------------------------------------------------|------------------|-------------------|---------------------------------|-------------------------------------|
|                                                                                                                                       | CHIP carriers    | CHIP non-carriers | <i>DNMT3A</i> mutation carriers | <i>DNMT3A</i> mutation non-carriers |
|                                                                                                                                       | <i>n</i> (row %) | <i>n</i> (row %)  | <i>n</i> (row %)                | <i>n</i> (row %)                    |
| <b>CHIP: Any</b>                                                                                                                      | 191 (3.9)        | 4,755 (96.1)      | 118 (2.4)                       | 4,828 (97.6)                        |
| <b>Age: years, mean [SD]</b>                                                                                                          | 64.5 [5.4]       | 62.3 [5.6]        | 64.1 [5.6]                      | 62.3 [5.6]                          |
| <b>Sex</b>                                                                                                                            |                  |                   |                                 |                                     |
| male                                                                                                                                  | 86 (3.9)         | 2,143 (96.1)      | 65 (2.4)                        | 2,652 (97.6)                        |
| female                                                                                                                                | 105 (3.9)        | 2,612 (96.1)      | 53 (2.4)                        | 2,176 (97.6)                        |
| <b>Race</b>                                                                                                                           |                  |                   |                                 |                                     |
| European American                                                                                                                     | 138 (3.6)        | 3,736 (96.4)      | 79 (2.0)                        | 3,795 (98.0)                        |
| African American                                                                                                                      | 53 (4.9)         | 1,019 (95.1)      | 39 (3.6)                        | 1,033 (96.4)                        |
| <b>Education level</b>                                                                                                                |                  |                   |                                 |                                     |
| Basic                                                                                                                                 | 30 (4.4)         | 648 (95.6)        | 19 (2.8)                        | 659 (97.2)                          |
| Intermediate                                                                                                                          | 70 (3.3)         | 2,029 (96.7)      | 40 (1.9)                        | 2,059 (98.1)                        |
| Advanced                                                                                                                              | 90 (4.2)         | 2,075 (95.8)      | 59 (2.7)                        | 2,106 (97.3)                        |
| <b>Current smoker</b>                                                                                                                 |                  |                   |                                 |                                     |
| no                                                                                                                                    | 154 (3.6)        | 4,155 (96.4)      | 92 (2.1)                        | 4,217 (97.9)                        |
| yes                                                                                                                                   | 35 (5.7)         | 582 (94.3)        | 25 (4.1)                        | 592 (95.9)                          |
| <b>Diabetic</b>                                                                                                                       |                  |                   |                                 |                                     |
| no                                                                                                                                    | 166 (3.9)        | 4,065 (96.1)      | 103 (2.4)                       | 4,128 (97.6)                        |
| yes                                                                                                                                   | 23 (3.4)         | 656 (96.6)        | 14 (2.1)                        | 665 (97.9)                          |
| <b>Body mass index (BMI)</b>                                                                                                          |                  |                   |                                 |                                     |
| <25.0 kg/m <sup>2</sup>                                                                                                               | 58 (4.6)         | 1,191 (95.4)      | 38 (3.0)                        | 1,211 (97.0)                        |
| 25.0-29.9 kg/m <sup>2</sup>                                                                                                           | 74 (3.7)         | 1,938 (96.3)      | 43 (2.1)                        | 1,969 (97.9)                        |
| ≥30.0 kg/m <sup>2</sup>                                                                                                               | 59 (3.5)         | 1,615 (96.5)      | 37 (2.2)                        | 1,637 (97.8)                        |
| <b>Episodic dental care</b>                                                                                                           |                  |                   |                                 |                                     |
| no                                                                                                                                    | 131 (3.7)        | 3,410 (96.3)      | 15 (0.4)                        | 3,526 (99.6)                        |
| yes                                                                                                                                   | 59 (4.3)         | 1,320 (95.7)      | 9 (0.7)                         | 1,370 (99.3)                        |

**Table S3. Associations between periodontal disease diagnoses, clinical measures of periodontal disease according to DNMT3A mutation carrier status obtained from marginal effects estimation\* - Related to Table 1**

|                                                                                                                                                                                   | crude model<br>p.p. (95% CI) | sex adjusted<br>p.p. (95% CI) | sex + age adjusted<br>p.p. (95% CI) |
|-----------------------------------------------------------------------------------------------------------------------------------------------------------------------------------|------------------------------|-------------------------------|-------------------------------------|
| <b>Periodontitis diagnosis</b><br>(reference: Stages I and II)                                                                                                                    |                              |                               |                                     |
| Stage IV                                                                                                                                                                          | 13.0 (2.3, 23.7)             | 12.8 (2.1, 23.5)              | 10.8 (0.0, 21.5)                    |
| <b>Clinical attachment loss</b>                                                                                                                                                   |                              |                               |                                     |
| (% of sites with CAL ≥3 mm)                                                                                                                                                       | 5.4 (1.0, 9.8)               | 5.4 (1.1, 9.7)                | 4.9 (0.6, 9.2)                      |
| <b>Gingival inflammation</b>                                                                                                                                                      |                              |                               |                                     |
| (% of sites with gingiva index ≥1)                                                                                                                                                | 8.8 (1.0, 16.5)              | 8.7 (1.0, 16.4)               | 9.2 (1.5, 17.0)                     |
| *Crude, sex-, and sex- and age-adjusted logistic and linear regression models and average marginal effects (percentage points, p.p.) and associated 95 confidence intervals (CI). |                              |                               |                                     |
